# Supplementary material
Source: PubMed Central journal article supplement (PMC9977231)
Supplement: glac123_suppl_supplementary_tables.pdf [file glac123_suppl_supplementary_tables.pdf]

**Table 1 Supplementary. Covariate-adjusted means  $\pm$ SEM for variables for each parity group.**

|                                           | <b>Nulliparous</b> | <b>Low parity</b> | <b>Medium parity</b> | <b>Grand multiparity</b> | <b>p-value</b> |
|-------------------------------------------|--------------------|-------------------|----------------------|--------------------------|----------------|
| Average DSST score                        | 39.94 $\pm$ 1.23   | 36.88 $\pm$ 0.83  | 39.32 $\pm$ 0.79     | 40.29 $\pm$ 1.35         | 0.05           |
| Average 3MS score                         | 91.73 $\pm$ 0.65   | 91.34 $\pm$ 0.44  | 92.16 $\pm$ 0.42     | 91.76 $\pm$ 0.72         | 0.63           |
| Change in DSST score over 10 years        | -0.61 $\pm$ 0.06   | -0.60 $\pm$ 0.04  | -0.60 $\pm$ 0.04     | -0.63 $\pm$ 0.06         | 0.98           |
| Change in 3MS score over 10 years         | -0.24 $\pm$ 0.06   | -0.26 $\pm$ 0.04  | -0.26 $\pm$ 0.04     | -0.25 $\pm$ 0.06         | 0.99           |
| Average time spent walking over 10 years* | 87.79 $\pm$ 14.88  | 98.48 $\pm$ 10.06 | 92.80 $\pm$ 9.61     | 76.14 $\pm$ 16.43        | 0.70           |

\* Average number of minutes spent walking over the past 7 days across the 10 year study period. Overall, participants were engaging in less walking than is currently recommended by the World Health Organization for people over the age of 65 (i.e., 150 minutes of moderate-intensity physical activity each week).
